# Supplementary material for: Impacts and interactions of COVID-19 response involvement, health-related behaviours, health literacy on anxiety, depression and health-related quality of life among healthcare workers: a cross-sectional study
Source: HighWire-hosted journal article supplement (doi:10.1136/bmjopen-2020-041394), 2020-12-01
Supplement: bmjopen-2020-041394supp001_data_supplement.pdf [file bmjopen-2020-041394supp001_data_supplement.pdf]

(A)

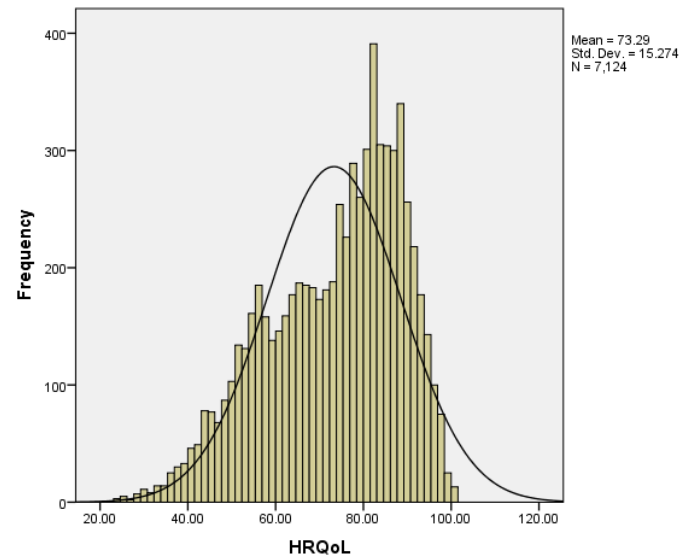

(B)

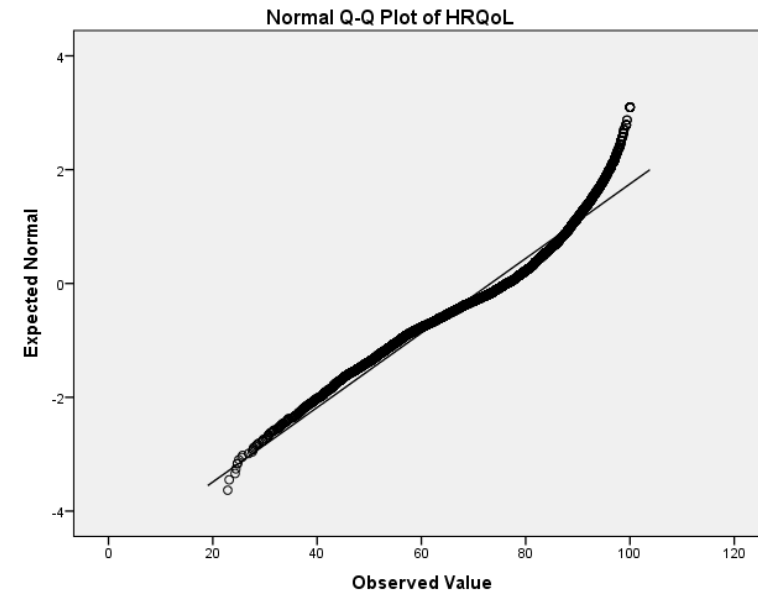

**Supplementary Figure 1** Distribution of health related quality of life (HRQoL) illustrated by histogram (A) and normal Q-Q plot (B)
